# Supplementary material for: A Systematic Review, Meta-Analysis, and Meta-Regression Evaluating the Efficacy and Mechanisms of Action of Probiotics and Synbiotics in the Prevention of Surgical Site Infections and Surgery-Related Complications
Source: PubMed Central journal article supplement (PMC6307089; doi:10.3390/jcm7120556), 2018-12-16
Supplement: jcm-07-00556-s001.pdf [file jcm-07-00556-s001.pdf]

# Pneumonia

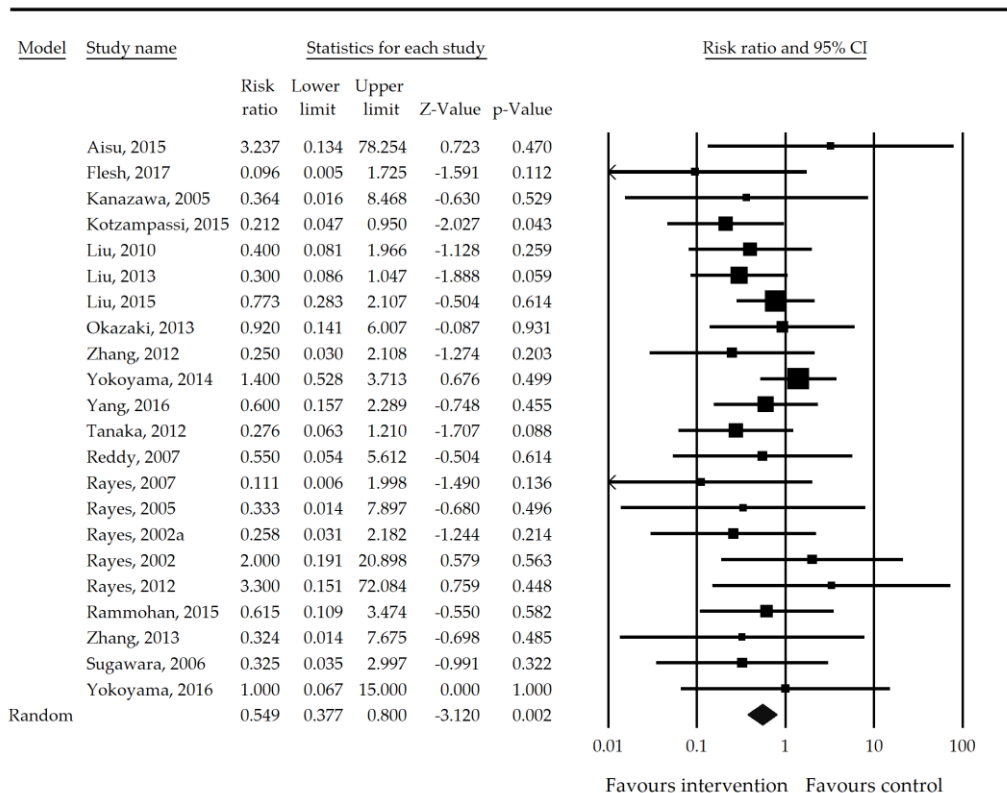

Figure S1. The effect size (risk ratio) for the overall effects of probiotics in the prevention of pneumonia.

# SSI

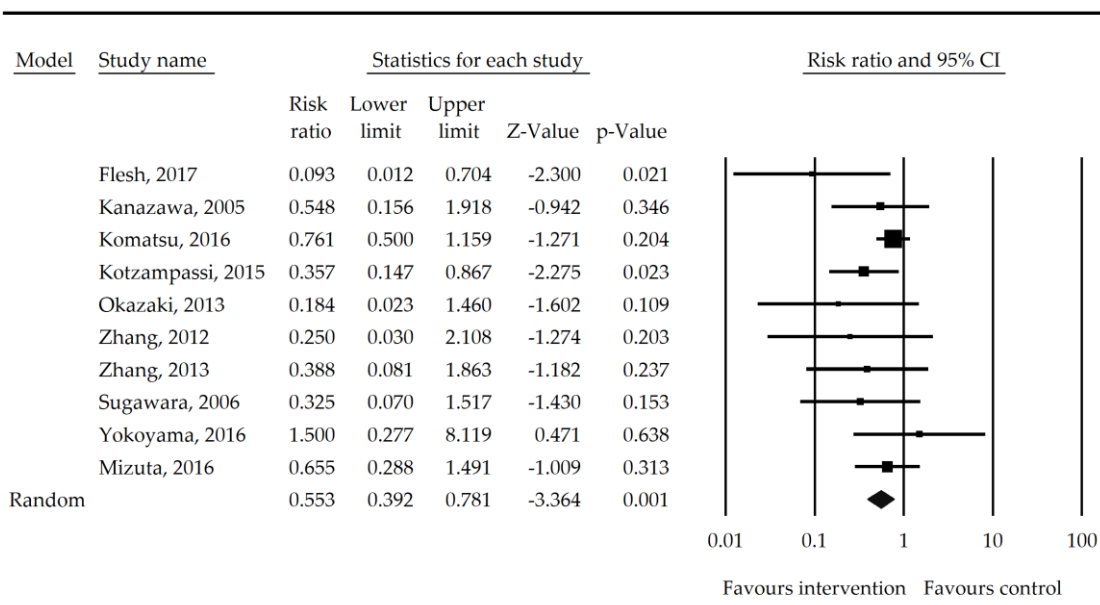

Figure S2. The effect size (risk ratio) for the overall effects of probiotics in the prevention of surgical site infection.

**Table S1.** The efficacy of probiotics to counteract surgery related complications (SRCs).

| Outcome                | RR (95% CI)          | Z-value             | References                                                                                                                                         | Heterogeneity                                    | Tau                            | Intercept (95%CI)†              | Meta-regression coefficients                                                                                                                                                                                                                                                           |
|------------------------|----------------------|---------------------|----------------------------------------------------------------------------------------------------------------------------------------------------|--------------------------------------------------|--------------------------------|---------------------------------|----------------------------------------------------------------------------------------------------------------------------------------------------------------------------------------------------------------------------------------------------------------------------------------|
| Abdominal distention   | 0.64<br>(0.47, 0.86) | -2.93<br>p=0.003    | Liu, 2010<br>Liu, 2015<br>Yang, 2016<br>Zhang, 2013                                                                                                | Q=0.247<br>p=0.970 (df=3)<br>I <sup>2</sup> =0   | $\tau^2=0$<br>$\tau=0$         | -0.47 (-2.07, 1.13)<br>p=0.334  | Dose: -0.03 (p=0.820)<br>Intervention (Synbiotic vs. Probiotic): -0.29 (p=0.672)<br>Operation (Hepatobiliary vs. Gut): -0.29 (p=0.672)<br>ROB (Low vs. High): -0.29 (p=0.672)<br>Duration: 0.01 (p=0.855)<br>Timing (Post vs. Peri) : -0.29 (p=0.672)                                  |
| Anastomotic leakage    | 0.73<br>(0.43, 1.24) | -1.17<br>p=0.244    | Komatsu, 2016<br>Kotzampassi, 2015<br>Zhang, 2012<br>Yokoyama, 2014<br>Yang, 2016<br>Tanaka, 2012<br>Sadahiro, 2014<br>Rayes, 2007<br>Mizuta, 2016 | Q=8.31<br>p=0.404 (df=8)<br>I <sup>2</sup> =3.69 | $\tau^2=0.027$<br>$\tau=0.163$ | -1.38 (-2.97, 0.22)<br>p=0.080  | Dose: 0.27 (p=0.484)<br>Intervention (Synbiotic vs. Probiotic): 0.95 (p=0.082)<br>Operation (Hepatobiliary vs. Gut): 0.11 (p=0.899)<br>ROB (Low vs. High): -0.29 (p=0.640)<br>Duration: 0.01 (p=0.889)<br>Timing (Pre vs. Peri): -1.32 (p=0.400)                                       |
| Deep organ space       | 0.62<br>(0.31, 1.25) | -1.34<br>p=0.180    | Aisu, 2015<br>Komatsu, 2016<br>Okazaki, 2013<br>Sadahiro, 2014<br>Mizuta, 2016                                                                     | Q=0.553<br>p=0.968 (df=4)<br>I <sup>2</sup> =0   | $\tau^2=0$<br>$\tau=0$         | -1.83 (-2.85, -0.81)<br>p=0.011 | Dose: NOT ESTIMABLE<br>Intervention (Synbiotic vs. Probiotic): -0.19 (p=0.799)<br>Operation (Mixed vs. Gut): 0.78 (p=0.509)<br>ROB (Low vs. High): -0.38 (p=0.598)<br>Duration: 0.001 (p=0.992)<br>Timing: NOT ESTIMABLE                                                               |
| Diarrhea               | 0.49<br>(0.37, 0.67) | -4.59<br>p=0.000004 | Diepenhorst, 2011<br>Liu, 2010<br>Liu, 2013<br>Liu, 2015<br>Yang, 2016<br>Tanaka, 2012<br>Zhang, 2013                                              | Q=3.61<br>p=0.730 (df=6)<br>I <sup>2</sup> =0    | $\tau^2=0$<br>$\tau=0$         | -0.27 (-1.92, 1.38)<br>p=0.691  | Dose: 0.05 (p=0.688)<br>Intervention (Synbiotic vs. Probiotic): -0.29 (p=0.714)<br>Operation (Hepatobiliary vs. Gut): -0.76 (p=0.438)<br>ROB (Low vs. High): -0.32 (p=0.659)<br>Duration: -0.09 (p=0.223)<br>Timing (Post vs. Peri): 1.39 (p=0.250)                                    |
| Intraabdominal abscess | 0.69<br>(0.35, 1.37) | -1.07<br>p=0.285    | Flesh, 2017<br>Kanazawa, 2005<br>Zhang, 2012<br>Yokoyama, 2014<br>Usami, 2011<br>Rayes, 2012<br>Sugawara, 2006<br>Yokoyama, 2016                   | Q=5.07<br>p=0.651 (df=7)<br>I <sup>2</sup> =0    | $\tau^2=0$<br>$\tau=0$         | 0.31 (-1.97, 2.59)<br>p=0.749   | Dose: -0.004 (p=0.993)<br>Intervention (Synbiotic vs. Probiotic): -1.17 (p=0.350)<br>Operation (Hepatobiliary vs. Gut): -0.66 (p=0.457)<br>ROB (Low vs. High): -0.82 (p=0.356)<br>Duration: -0.04 (p=0.381)<br>Timing (Post vs. Peri): -0.06 (p=0.952), (Pre vs. Peri): 1.24 (p=0.334) |

|                |                      |                  |                                                                                                                                                                                                                                                                                                                                                         |                                                  |                                |                                 |                                                                                                                                                                                                                                                                                                                            |
|----------------|----------------------|------------------|---------------------------------------------------------------------------------------------------------------------------------------------------------------------------------------------------------------------------------------------------------------------------------------------------------------------------------------------------------|--------------------------------------------------|--------------------------------|---------------------------------|----------------------------------------------------------------------------------------------------------------------------------------------------------------------------------------------------------------------------------------------------------------------------------------------------------------------------|
| Mortality      | 1.17<br>(0.54, 2.57) | 0.40<br>p=0.691  | Anderson, 2003<br>Eguchi, 2011<br>Mangell, 2012<br>McNaught, 2002<br>Nomura, 2007<br>Sommecal, 2015<br>Rayes, 2007                                                                                                                                                                                                                                      | Q=7.54<br>p=0.274 (df=6)<br>I <sup>2</sup> =20.4 | $\tau^2=0.226$<br>$\tau=0.476$ | -2.03 (-4.15, 0.10)<br>p=0.058  | Dose: -1.10 (p=0.327)<br>Intervention (Synbiotic vs. Probiotic): -0.31 (p=0.745)<br>Operation (Hepatobiliary vs. Gut): -0.67 (p=0.487)<br>ROB (Low vs. High): 0.54 (p=0.557)<br>Duration: 0.20 (p=0.340)<br>Timing: NOT ESTIMABLE                                                                                          |
| MRSA infection | 0.34<br>(0.11, 1.06) | -1.87<br>p=0.062 | Eguchi, 2011<br>Komatsu, 2016<br>Kotzampassi, 2015<br>Usami, 2011                                                                                                                                                                                                                                                                                       | Q=0.891<br>p=0.828 (df=3)<br>I <sup>2</sup> =0   | $\tau^2=0$<br>$\tau=0$         | -1.97 (-2.96, -0.97)<br>p=0.014 | Dose: NOT ESTIMABLE<br>Intervention (Synbiotic vs. Probiotic): 0.09 (p=0.944)<br>Operation (Hepatobiliary vs. Gut): -1.06 (p=0.402)<br>ROB (Low vs. High): -1.02 (p=0.526)<br>Duration: -0.08 (p=0.540)<br>Timing: NOT ESTIMABLE                                                                                           |
| Peritonitis    | 0.34<br>(0.09, 1.32) | -1.56<br>p=0.119 | Zhang, 2012<br>Rayes, 2007<br>Zhang, 2013<br>Grat, 2017                                                                                                                                                                                                                                                                                                 | Q=1.75<br>p=0.625 (df=3)<br>I <sup>2</sup> =0    | $\tau^2=0$<br>$\tau=0$         | -3.67 (-21.8, 14.5)<br>p=0.475  | Dose: -0.57 (p=0.422)<br>Intervention (Synbiotic vs. Probiotic): -1.67 (p=0.229)<br>Operation (Hepatobiliary vs. Gut): -0.56 (p=0.699)<br>ROB (Low vs. High): -1.67 (p=0.229)<br>Duration: NOT ESTIMABLE<br>Timing: NOT ESTIMABLE                                                                                          |
| Pneumonia      | 0.55<br>(0.38, 0.80) | -3.12<br>p=0.002 | Aisu, 2015<br>Flesh, 2017<br>Kanazawa, 2005<br>Kotzampassi, 2015<br>Liu, 2010<br>Liu, 2013<br>Liu, 2015<br>Okazaki, 2013<br>Zhang, 2012<br>Yokoyama, 2014<br>Yang, 2016<br>Tanaka, 2012<br>Reddy, 2007<br>Rayes, 2007<br>Rayes, 2005<br>Rayes, 2002a<br>Rayes, 2002<br>Rayes, 2012<br>Rammohan, 2015<br>Zhang, 2013<br>Sugawara, 2006<br>Yokoyama, 2016 | Q=15.7<br>p=0.789 (df=21)<br>I <sup>2</sup> =0   | $\tau^2=0$<br>$\tau=0$         | -0.47 (-1.49, 0.56)<br>p=0.355  | Dose: 0.08 (p=0.665)<br>Intervention (Synbiotic vs. Probiotic): 0.31 (p=0.422)<br>Operation (Hepatobiliary vs. Gut): -0.19 (p=0.687),<br>(Mixed vs. Gut): 0.84 (p=0.285)<br>ROB (Low vs. High): -0.16 (p=0.687)<br>Duration: 0.01 (p=0.775)<br>Timing (Post vs. Peri): -0.14 (p=0.834), (Pre vs. Peri):<br>-0.45 (p=0.583) |
| Reoperation    | 0.43<br>(0.14, 1.29) | -1.51<br>p=0.132 | Komatsu, 2016<br>Mangell, 2012<br>Grat, 2017                                                                                                                                                                                                                                                                                                            | Q=1.22<br>p=0.545 (df=2)<br>I <sup>2</sup> =0    | $\tau^2=0$<br>$\tau=0$         | 0.57 (-28.5, 29.6 )<br>p=0.845  | NOT ESTIMABLE                                                                                                                                                                                                                                                                                                              |

|                        |                      |                    |                                                                                                                                                                                                                                        |                                                  |                                |                                 |                                                                                                                                                                                                                                                                                                                               |
|------------------------|----------------------|--------------------|----------------------------------------------------------------------------------------------------------------------------------------------------------------------------------------------------------------------------------------|--------------------------------------------------|--------------------------------|---------------------------------|-------------------------------------------------------------------------------------------------------------------------------------------------------------------------------------------------------------------------------------------------------------------------------------------------------------------------------|
| Sepsis                 | 0.69<br>(0.58, 0.81) | -4.56<br>p=0.00001 | Eguchi, 2011<br>Liu, 2013<br>Liu, 2015<br>Zhang, 2012<br>Rayes, 2007<br>Rayes, 2002<br>Rammohan, 2015                                                                                                                                  | Q=5.43<br>p=0.491 (df=6)<br>I <sup>2</sup> =0    | $\tau^2=0$<br>$\tau=0$         | -0.97 (-1.67, -0.26)<br>p=0.017 | Dose: 0.55 (p=0.062)<br>Intervention (Synbiotic vs. Probiotic): -1.12 (p=0.154)<br>Operation (Hepatobiliary vs. Gut): -1.23 (p=0.168),<br>(Mixed vs. Gut): -0.73 (p=0.650)<br>ROB (Low vs. High): -1.12 (p=0.154)<br>Duration: 0.12 (p=0.065)<br>Timing (Post vs. Peri): -0.73 (p=0.650), (Pre vs. Peri):<br>-1.71 (p=0.097)  |
| SSI                    | 0.55<br>(0.39, 0.78) | -3.36<br>p=0.001   | Flesh, 2017<br>Kanazawa, 2005<br>Komatsu, 2016<br>Kotzampassi, 2015<br>Okazaki, 2013<br>Zhang, 2012<br>Zhang, 2013<br>Sugawara, 2006<br>Yokoyama, 2016<br>Mizuta, 2016                                                                 | Q=9.77<br>p=0.369 (df=9)<br>I <sup>2</sup> =7.89 | $\tau^2=0.027$<br>$\tau=0.163$ | -1.24 (-2.37, -0.11)<br>p=0.035 | Dose: 0.40 (p=0.136)<br>Intervention (Synbiotic vs. Probiotic): 0.22 (p=0.592)<br>Operation (Hepatobiliary vs. Gut): 0.0001 (p=1.0),<br>(Mixed vs. Gut): -1.09 (p=0.326)<br>ROB (Low vs. High): -0.21 (p=0.582)<br>Duration: -0.03 (p=0.403)<br>Timing (Post vs. Peri): -0.06 (p=0.913), (Pre vs. Peri):<br>-0.71 (p=0.537)   |
| Superficial incisional | 0.53<br>(0.38, 0.74) | -3.77<br>p=0.0002  | Aisu, 2015<br>Komatsu, 2016<br>Liu, 2010<br>Liu, 2015<br>Okazaki, 2013<br>Yokoyama, 2014<br>Yang, 2016<br>Usami, 2011<br>Tanaka, 2012<br>Sadahiro, 2014<br>Reddy, 2007<br>Rayes, 2007<br>Rayes, 2005<br>Rammohan, 2015<br>Mizuta, 2016 | Q=6.65<br>p=0.947 (df=14)<br>I <sup>2</sup> =0   | $\tau^2=0$<br>$\tau=0$         | -0.17 (-1.08, 0.75)<br>p=0.703  | Dose: 0.28 (p=0.240)<br>Intervention (Synbiotic vs. Probiotic): 0.14 (p=0.670)<br>Operation (Hepatobiliary vs. Gut): -0.19 (p=0.674),<br>(Mixed vs. Gut): -1.44 (p=0.335)<br>ROB (Low vs. High): -0.2603 (p=0.441)<br>Duration: -0.03 (p=0.338)<br>Timing (Post vs. Peri): -0.46 (p=0.778), (Pre vs. Peri):<br>0.33 (p=0.706) |
| UTI                    | 0.32<br>(0.18, 0.57) | -3.89<br>p=0.0001  | Aisu, 2015<br>Eguchi, 2011<br>Kotzampassi, 2015<br>Liu, 2010<br>Liu, 2013<br>Liu, 2015<br>Okazaki, 2013<br>Yang, 2016<br>Rayes, 2007<br>Rayes, 2005<br>Rayes, 2002a<br>Rayes, 2002<br>Rammohan, 2015<br>Zhang, 2013                    | Q=9.51<br>p=0.734 (df=13)<br>I <sup>2</sup> =0   | $\tau^2=0$<br>$\tau=0$         | -0.17 (-1.84, 1.51)<br>p=0.832  | Dose: -0.53 (p=0.104)<br>Intervention (Synbiotic vs. Probiotic): -0.22 (p=0.722)<br>Operation (Hepatobiliary vs. Gut): -0.48 (p=0.454),<br>(Mixed vs. Gut): 1.01 (p=0.399)<br>ROB (Low vs. High): -0.19 (p=0.746)<br>Duration: -0.17 (p=0.071)<br>Timing (Post vs. Peri): -0.27 (p=0.700)                                     |

† Egger's regression intercept test for asymmetry of the funnel plots; Dose – dose of probiotic (log), ROB – risk of bias, Post – post operation, Pre – pre operation, Peri – peri operation, SSI- surgical site infection

| Outcome                           | SMD (95%CI)              | Z-value              | References                                                                                                                                                 | Heterogeneity                                     | Tau                            | Intercept (95%CI)†               | Meta-regression coefficients                                                                                                                                                                                                                                                              |
|-----------------------------------|--------------------------|----------------------|------------------------------------------------------------------------------------------------------------------------------------------------------------|---------------------------------------------------|--------------------------------|----------------------------------|-------------------------------------------------------------------------------------------------------------------------------------------------------------------------------------------------------------------------------------------------------------------------------------------|
| Blood loss                        | 0.004<br>(-0.120, 0.128) | 0.059<br>p=0.953     | Komatsu, 2016<br>Liu, 2010<br>Liu, 2015<br>Yang, 2016<br>Sadahiro, 2014<br>Rammohan, 2015<br>Sugawara, 2006                                                | Q=3.15<br>p=0.789 (df=6)<br>I <sup>2</sup> =0     | $\tau^2=0$<br>$\tau=0$         | -0.43 (-2.92, 2.06)<br>p=0.675   | Dose: -0.04 (p=0.642)<br>Intervention (Synbiotic vs. Probiotic): -0.01 (p=0.922)<br>Operation (Hepatobiliary vs. Gut): 0.16 (p=0.373)<br>ROB (Low vs. High): -0.16 (p=0.373)<br>Duration: -0.02 (p=0.135)<br>Timing: NOT ESTIMABLE                                                        |
| Duration of antibiotic therapy    | -0.60<br>(-1.09, -0.10)  | -2.36<br>p=0.018     | Kanazawa, 2005<br>Liu, 2010<br>Liu, 2013<br>Liu, 2015<br>Yang, 2016<br>Tanaka, 2012<br>Sommacal, 2015<br>Rayes, 2002a<br>Zhang, 2013<br>Sugawara, 2006     | Q=102<br>p<0.00001 (df=9)<br>I <sup>2</sup> =91   | $\tau^2=0.575$<br>$\tau=0.758$ | -4.91 (-15.57, 5.74)<br>p=0.319  | Dose: -0.16 (p=0.514)<br>Intervention (Synbiotic vs. Probiotic) : -0.66 (p=0.212)<br>Operation (Hepatobiliary vs. Gut): -0.86 (p=0.085)<br>ROB (Low vs. High): -0.50 (p=0.342)<br>Duration: 0.08 (p=0.085)<br>Timing (Post vs. Peri): -0.95 (p=0.083)                                     |
| Duration of postoperative pyrexia | -0.44<br>(-0.68, -0.192) | -3.50<br>p=0.0005    | Liu, 2010<br>Liu, 2013<br>Liu, 2015<br>Yang, 2016                                                                                                          | Q=4.85<br>p=0.183 (df=3)<br>I <sup>2</sup> =38.1  | $\tau^2=0.024$<br>$\tau=0.154$ | 2.90 (-15.65, 21.46)<br>p=0.570  | Dose: -0.17 (p=0.072)<br>Intervention: NOT ESTIMABLE<br>Operation: NOT ESTIMABLE<br>ROB: NOT ESTIMABLE<br>Duration: -0.13 (p=0.072)<br>Timing: NOT ESTIMABLE                                                                                                                              |
| Fluid diet                        | -0.35<br>(-0.58, -0.12)  | -3.00<br>p=0.003     | Liu, 2010<br>Liu, 2015<br>Yang, 2016                                                                                                                       | Q=1.31<br>p=0.520 (df=2)<br>I <sup>2</sup> =0     | $\tau^2=0$<br>$\tau=0$         | -0.06 (-52.91, 52.80)<br>p=0.991 | Dose: NOT ESTIMABLE<br>Intervention: NOT ESTIMABLE<br>Operation: NOT ESTIMABLE<br>ROB: NOT ESTIMABLE<br>Duration: NOT ESTIMABLE<br>Timing: NOT ESTIMABLE                                                                                                                                  |
| Hospital stay                     | -0.48<br>(-0.66, -0.30)  | -5.17<br>p=0.0000002 | Kanazawa, 2005<br>Kotzampassi, 2015<br>Liu, 2010<br>Liu, 2015<br>Zhang, 2012<br>Yang, 2016<br>Usami, 2011<br>Sommacal, 2015<br>Rayes, 2002a<br>Zhang, 2013 | Q=20.2<br>p=0.042 (df=11)<br>I <sup>2</sup> =45.7 | $\tau^2=0.045$<br>$\tau=0.213$ | 0.60 (-3.87, 5.07)<br>p=0.771    | Dose: -0.03 (p=0.773)<br>Intervention (Synbiotic vs. Probiotic): -0.25 (p=0.183)<br>Operation (Hepatobiliary vs. Gut): -0.25 (p=0.183)<br>ROB (Low vs. High): -0.002 (p=0.994)<br>Duration: -0.005 (p=0.7434)<br>Timing (Post vs. Peri): -0.10 (p=0.679), (Pre vs. Peri): -0.23 (p=0.551) |

|                |                         |                  |                                                                                                                                                                      |                                                      |                                |                                 |                                                                                                                                                                                                                                                            |
|----------------|-------------------------|------------------|----------------------------------------------------------------------------------------------------------------------------------------------------------------------|------------------------------------------------------|--------------------------------|---------------------------------|------------------------------------------------------------------------------------------------------------------------------------------------------------------------------------------------------------------------------------------------------------|
|                |                         |                  | Sugawara, 2006<br>Mizuta, 2016                                                                                                                                       |                                                      |                                |                                 |                                                                                                                                                                                                                                                            |
| ICU stay       | -0.10<br>(-0.36, 0.16)  | -0.73<br>p=0.460 | Kanazawa, 2005<br>Usami, 2011<br>Tanaka, 2012<br>Rayes, 2002a                                                                                                        | Q=1.35<br>p=0.719 (df=3)<br>I <sup>2</sup> =0        | $\tau^2=0$<br>$\tau=0$         | 3.23 (-19.10, 25.56)<br>p=0.597 | Dose: -0.05 (p=0.922)<br>Intervention: NOT ESTIMABLE<br>Operation (Hepatobiliary vs. Gut): 0.25 (p=0.406)<br>ROB (Low vs. High): -0.28 (p=0.357)<br>Duration: 0.009 (p=0.697)<br>Timing (Post vs. Peri): -0.02 (p=0.944)                                   |
| Operating time | 0.02<br>(-0.14, 0.18)   | 0.26<br>p=0.797  | Komatsu, 2016<br>Liu, 2010<br>Liu, 2013<br>Liu, 2015<br>Zhang, 2012<br>Yang, 2016<br>Sadahiro, 2014<br>Rayes, 2002a<br>Zhang, 2013<br>Sugawara, 2006<br>Mizuta, 2016 | Q=19.6<br>p=0.033<br>(df=10)<br>I <sup>2</sup> =49.0 | $\tau^2=0.034$<br>$\tau=0.184$ | 0.20 (-3.07, 3.47)<br>p=0.893   | Dose: -0.06 (p=0.502)<br>Intervention: -0.04 (p=0.820)<br>Operation (Hepatobiliary vs. Gut): 0.06 (p=0.754)<br>ROB (Low vs. High): 0.005 (p=0.979)<br>Duration: -0.0006 (p=0.966)<br>Timing (Post vs. Peri): 0.28 (p=0.248), (Pre vs. Peri): -0.15 (0.665) |
| Solid diet     | -0.31<br>(-0.50, -0.12) | -3.26<br>p=0.001 | Aisu, 2015<br>Liu, 2010<br>Liu, 2015<br>Yang, 2016                                                                                                                   | Q=1.97<br>p=0.578 (df=3)<br>I <sup>2</sup> =0        | $\tau^2=0$<br>$\tau=0$         | 2.44 (-8.04, 12.93)<br>p=0.422  | Dose: NOT ESTIMABLE<br>Intervention: NOT ESTIMABLE<br>Operation: NOT ESTIMABLE<br>ROB (Low vs. High): -0.26 (p=0.194)<br>Duration: NOT ESTIMABLE<br>Timing: NOT ESTIMABLE                                                                                  |

† Egger's regression intercept test for asymmetry of the funnel plots; Dose – dose of probiotic (log), ROB – risk of bias, Post – post operation, Pre – pre operation, Peri – peri operation

**Table S2.** Risk of bias assesement.

| Study reference | Publication year | Random sequence generation (selection bias) | Allocation concealment (selection bias) | Blinding of participants and personnel (performance bias) | Blinding of outcome assessment (detection bias) | Incomplete outcome data addressed (attrition bias) | Selective reporting (reporting bias) | Other bias | No. of low assesments |
|-----------------|------------------|---------------------------------------------|-----------------------------------------|-----------------------------------------------------------|-------------------------------------------------|----------------------------------------------------|--------------------------------------|------------|-----------------------|
| Aisu            | 2015             | H                                           | H                                       | H                                                         | H                                               | L                                                  | L                                    | ?          | 2                     |
| Anderson        | 2003             | L                                           | L                                       | L                                                         | L                                               | L                                                  | ?                                    | ?          | 5                     |
| Diepenhorst     | 2011             | L                                           | L                                       | ?                                                         | ?                                               | ?                                                  | L                                    | ?          | 3                     |
| Eguchi          | 2011             | ?                                           | ?                                       | ?                                                         | ?                                               | L                                                  | ?                                    | ?          | 1                     |
| Flesh           | 2017             | L                                           | H                                       | L                                                         | H                                               | ?                                                  | H                                    | ?          | 2                     |
| Grą             | 2017             | L                                           | L                                       | L                                                         | L                                               | L                                                  | L                                    | ?          | 6                     |
| Horvat          | 2010             | ?                                           | ?                                       | L                                                         | L                                               | H                                                  | ?                                    | L          | 3                     |
| Kanazawa        | 2005             | ?                                           | ?                                       | ?                                                         | L                                               | H                                                  | ?                                    | ?          | 1                     |
| Komatsu         | 2016             | L                                           | L                                       | H                                                         | H                                               | L                                                  | L                                    | L          | 5                     |
| kotzampassi     | 2015             | ?                                           | L                                       | L                                                         | L                                               | L                                                  | L                                    | H          | 5                     |
| Liu             | 2011             | L                                           | L                                       | H                                                         | L                                               | H                                                  | H                                    | L          | 4                     |
| Liu             | 2013             | L                                           | L                                       | L                                                         | L                                               | H                                                  | ?                                    | L          | 5                     |
| Liu             | 2015             | L                                           | L                                       | L                                                         | L                                               | ?                                                  | L                                    | ?          | 5                     |
| Mangell         | 2012             | ?                                           | ?                                       | L                                                         | L                                               | H                                                  | L                                    | L          | 4                     |
| McNaught        | 2002             | L                                           | ?                                       | H                                                         | ?                                               | H                                                  | ?                                    | ?          | 1                     |
| Mizuta          | 2016             | L                                           | H                                       | ?                                                         | ?                                               | L                                                  | ?                                    | ?          | 2                     |
| Nomura          | 2007             | ?                                           | ?                                       | ?                                                         | ?                                               | L                                                  | ?                                    | ?          | 1                     |
| Okazaki         | 2013             | ?                                           | ?                                       | H                                                         | ?                                               | L                                                  | ?                                    | H          | 1                     |
| Rammohan        | 2015             | L                                           | H                                       | H                                                         | H                                               | L                                                  | L                                    | ?          | 3                     |
| Rayes           | 2007             | ?                                           | ?                                       | L                                                         | L                                               | H                                                  | H                                    | ?          | 2                     |
| Rayes           | 2005             | ?                                           | ?                                       | L                                                         | L                                               | L                                                  | H                                    | ?          | 3                     |
| Rayes           | 2002a            | ?                                           | ?                                       | ?                                                         | ?                                               | H                                                  | H                                    | ?          | 0                     |
| Rayes           | 2002             | ?                                           | ?                                       | ?                                                         | ?                                               | H                                                  | H                                    | ?          | 0                     |
| Rayes           | 2012             | ?                                           | ?                                       | L                                                         | L                                               | H                                                  | H                                    | ?          | 2                     |

|          |      |   |   |   |   |   |   |   |   |
|----------|------|---|---|---|---|---|---|---|---|
| Reddy    | 2007 | ? | ? | ? | ? | L | ? | ? | 1 |
| Sadahiro | 2014 | L | L | L | L | L | L | ? | 6 |
| Sommacal | 2015 | L | L | L | L | L | L | L | 7 |
| Sugawara | 2006 | ? | H | ? | ? | L | L | ? | 2 |
| Tanaka   | 2012 | L | H | H | H | L | L | ? | 3 |
| Usami    | 2011 | L | L | L | ? | L | H | H | 4 |
| Yang     | 2016 | L | L | L | L | H | L | ? | 5 |
| Yokoyama | 2014 | L | L | H | L | L | L | H | 5 |
| Yokoyama | 2016 | L | H | H | H | L | ? | ? | 2 |
| Zhang    | 2012 | ? | L | L | L | L | ? | L | 5 |
| Zhang    | 2013 | H | H | H | H | L | L | ? | 2 |

L-low risk of bias, H-high risk of bias, ?-unclear risk of bias
